# Supplementary material for: HDL Cholesterol Efflux and the Complement System Are Linked in Systemic Lupus Erythematosus
Source: MDPI journal article supplement (doi:10.3390/jcm12165405), 2023-08-20
Supplement: s1 [file s1]

Table S1. Full lipid profile molecules relation to routes and individual elements of the complement system

|                          |             | Spearman's rho correlation coefficient, p |                               |                 |                                             |                               |                               |                                   |                               |                                     |                                |                               |
|--------------------------|-------------|-------------------------------------------|-------------------------------|-----------------|---------------------------------------------|-------------------------------|-------------------------------|-----------------------------------|-------------------------------|-------------------------------------|--------------------------------|-------------------------------|
|                          |             | Classical route                           |                               | Lectin route    | Classical and Lectin routes common elements |                               |                               | Alternative route                 |                               | Common elements of the three routes |                                |                               |
|                          |             | CL                                        | C1q                           | LE              | C2                                          | C4                            | C1inh                         | AL                                | fD                            | C3                                  | C3a                            | fH                            |
| Cholesterol, mg/dl       | 199 ± 38    | 0.1321<br>0.061                           | <b>0.1567</b><br><b>0.028</b> | 0.0766<br>0.28  | <b>0.2155</b><br><b>0.002</b>               | <b>0.1638</b><br><b>0.026</b> | 0.0372<br>0.63                | <b>0.1868</b><br><b>0.008</b>     | -0.0594<br>0.48               | 0.0778<br>0.29                      | 0.0283<br>0.69                 | 0.1142<br>0.17                |
| Triglycerides, mg/dl     | 128 ± 78    | 0.1355<br>0.055                           | <b>0.1182</b><br><b>0.013</b> | 0.1159<br>0.10  | 0.1362<br>0.097                             | <b>0.0795</b><br><b>0.022</b> | 0.1783<br>0.053               | <b>0.1742</b><br><b>0.008</b>     | <b>0.0979</b><br><b>0.013</b> | 0.1936<br>0.28                      | 0.1765<br>0.24                 | 0.1551<br>0.063               |
| HDL, mg/dl               | 63 ± 21     | -0.0449<br>0.53                           | -0.1030<br>0.15               | -0.0364<br>0.61 | -0.0065<br>0.93                             | 0.0446<br>0.55                | -0.1476<br>0.059              | 0.0593<br>0.40                    | -0.1207<br>0.15               | -0.0260<br>0.72                     | <b>-0.1441</b><br><b>0.042</b> | -0.0034<br>0.97               |
| LDL, mg/dl               | 111 ± 29    | 0.1270<br>0.072                           | <b>0.2029</b><br><b>0.004</b> | 0.0832<br>0.24  | <b>0.1676</b><br><b>0.017</b>               | 0.1142<br>0.12                | 0.0379<br>0.63                | 0.0922<br>0.19                    | -0.1071<br>0.20               | 0.0486<br>0.51                      | 0.0247<br>0.73                 | 0.0603<br>0.47                |
| LDL:HDL ratio            | 1.94 ± 0.77 | <b>0.1419</b><br><b>0.044</b>             | <b>0.2055</b><br><b>0.004</b> | 0.0901<br>0.20  | 0.1235<br>0.080                             | 0.0507<br>0.49                | 0.1493<br>0.056               | 0.0441<br>0.53                    | 0.0029<br>0.97                | 0.0578<br>0.43                      | 0.1168<br>0.10                 | 0.0528<br>0.53                |
| Non-HDL chol., mg/dl     | 137 ± 34    | <b>0.1516</b><br><b>0.031</b>             | <b>0.2344</b><br><b>0.001</b> | 0.1090<br>0.12  | <b>0.2362</b><br><b>0.001</b>               | 0.1390<br>0.059               | 0.1288<br>0.099               | <b>0.1571</b><br><b>0.026</b>     | -0.0519<br>0.53               | 0.1312<br>0.074                     | 0.1049<br>0.14                 | 0.1436<br>0.085               |
| Lipoprotein (a), mg/dl   | 40 (13-117) | 0.0163<br>0.82                            | 0.0575<br>0.42                | -0.0797<br>0.26 | 0.1202<br>0.089                             | <b>0.1947</b><br><b>0.008</b> | <b>0.1552</b><br><b>0.047</b> | 0.0439<br>0.54                    | 0.1313<br>0.12                | 0.0598<br>0.42                      | 0.0828<br>0.24                 | 0.1195<br>0.15                |
| Apolipoprotein A1, mg/dl | 179 ± 37    | 0.0114<br>0.87                            | -0.0270<br>0.71               | -0.0133<br>0.85 | 0.1076<br>0.13                              | 0.0565<br>0.44                | -0.0868<br>0.27               | 0.1029<br>0.15                    | -0.0902<br>0.28               | 0.0588<br>0.43                      | -0.0010<br>0.99                | 0.0132<br>0.87                |
| Apolipoprotein B, mg/dl  | 96 ± 24     | 0.0741<br>0.29                            | <b>0.1469</b><br><b>0.039</b> | 0.0651<br>0.36  | <b>0.1484</b><br><b>0.035</b>               | 0.1208<br>0.10                | 0.0459<br>0.56                | <b>0.2776</b><br><b>&lt;0.001</b> | 0.0264<br>0.75                | 0.0806<br>0.27                      | 0.0771<br>0.28                 | <b>0.2728</b><br><b>0.001</b> |
| ApoB:Apo A1 ratio        | 0.55 ± 0.17 | 0.0476<br>0.50                            | 0.1322<br>0.063               | 0.0683<br>0.33  | 0.0551<br>0.44                              | 0.0902<br>0.22                | 0.1278<br>0.10                | <b>0.1662</b><br><b>0.018</b>     | 0.0546<br>0.51                | 0.0543<br>0.46                      | 0.0820<br>0.25                 | <b>0.2141</b><br><b>0.010</b> |
| Atherogenic index        | 3.43 ± 1.10 | 0.1317<br>0.062                           | <b>0.1940</b><br><b>0.006</b> | 0.0704<br>0.32  | <b>0.1403</b><br><b>0.047</b>               | 0.0566<br>0.44                | <b>0.1871</b><br><b>0.016</b> | 0.0602<br>0.39                    | 0.0493<br>0.56                | 0.1063<br>0.15                      | <b>0.1553</b><br><b>0.029</b>  | 0.0955<br>0.25                |
| CEC, %                   | 8.1 ± 4.2   | -0.0544<br>0.46                           | 0.0675<br>0.36                | -0.0931<br>0.21 | 0.1005<br>0.17                              | <b>0.1519</b><br><b>0.047</b> | -0.0707<br>0.39               | <b>-0.2213</b><br><b>0.002</b>    | -0.0390<br>0.66               | 0.1252<br>0.10                      | 0.1205<br>0.10                 | -0.0681<br>0.44               |

Lipid profile molecules are shown as means ± standard deviation or median (interquartile range) when data were not normally distributed. \*Significant p values are depicted in bold. HDL: high density lipoprotein, LDL: low density lipoprotein, CEC: cholesterol efflux capacity, CL: classical route functional assay, LE: lectin route functional assay, AL: alternative route functional assay, fD: factor D, fH: factor.
